# Supplementary material
Source: Springer Nature journal article supplement (https://www.springermedizin.de/resource/supplementary/10194_2013_270_MOESM1_ESM.pdf/9422574)
Supplement: MOESM1 [file 9422574]

**HUNT 2 1995-1997**

**HUNT 3 2006-2008**

**92,566**

Invited age  $\geq$  20 years

**93,860**

Invited age  $\geq$  20 years

**65,237 (70%)**

Answered Q1 HUNT 2

**50,807 (54%)**

Answered Q1 HUNT 3

**50,738 (55%)**

Answered insomnia items in  
Q2 and pain questions

**40,534 (43%)**

Answered insomnia  
questions in HUNT 3

**10,738**

Deceased or moved  
before HUNT 3

**40,255**

Participated in both  
HUNT 2 and HUNT 3

**26,151**

Answered insomnia section in  
HUNT 2 and HUNT 3 and  
classified according to pain  
status in HUNT 2

**19,271**

Insomnia-free in HUNT 2  
(population at risk)

**6880**

With insomnia in HUNT 2
